# Supplementary material for: Exploring the optical properties of La2Hf2O7:Pr3+ nanoparticles under UV and X-ray excitation for potential lighting and scintillating applications
Source: Royal Society of Chemistry journal article supplement (doi:10.1039/c8nj00895g), 2018-01-01
Supplement: c8nj00895g1.pdf [file c8nj00895g1.pdf]

## Supporting information

### Exploring optical properties of $\text{La}_2\text{Hf}_2\text{O}_7:\text{Pr}^{3+}$ nanoparticles under UV and X-ray excitations for potential lighting and scintillating applications

Jose Zuniga<sup>1</sup>, Santosh K. Gupta<sup>1,2</sup>, Madhab Pokhrel<sup>1,3</sup>, Yuanbing Mao<sup>1,4\*</sup>

<sup>1</sup>Department of Chemistry, University of Texas Rio Grande Valley, 1201 West University Drive, Edinburg, Texas 78539, USA

<sup>2</sup>Radiochemistry Division, Bhabha Atomic Research Center, Mumbai, India, 400085

<sup>3</sup>Department of Physics, University of Texas Rio Grande Valley, 1201 West University Drive, Edinburg, Texas 78539, USA

<sup>4</sup>School of Earth, Environmental, and Marine Sciences, University of Texas Rio Grande Valley, 1201 West University Drive, Edinburg, Texas 78539, USA

\*To whom correspondence should be addressed. Email: yuanbing.mao@utrgv.edu, Tel.: +1-956-665-2986.

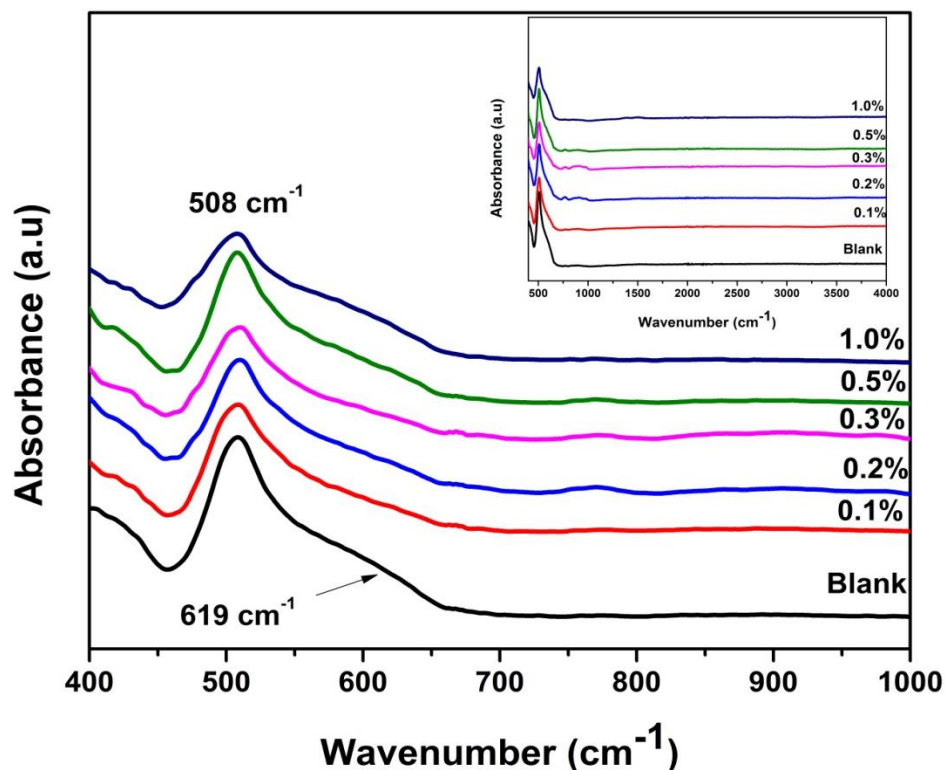

**Figure S1.** FTIR spectra of the  $\text{La}_2\text{Hf}_2\text{O}_7:\text{xmol}\%\text{Pr}^{3+}$  ( $x = 0, 0.1, 0.2, 0.3, 0.5,$  and  $1.0$ ) NPs after calcinated at  $900^\circ\text{C}$ . Inset shows full range spectra depicting no peaks from OH or nitrogen.

### La 3d (a)

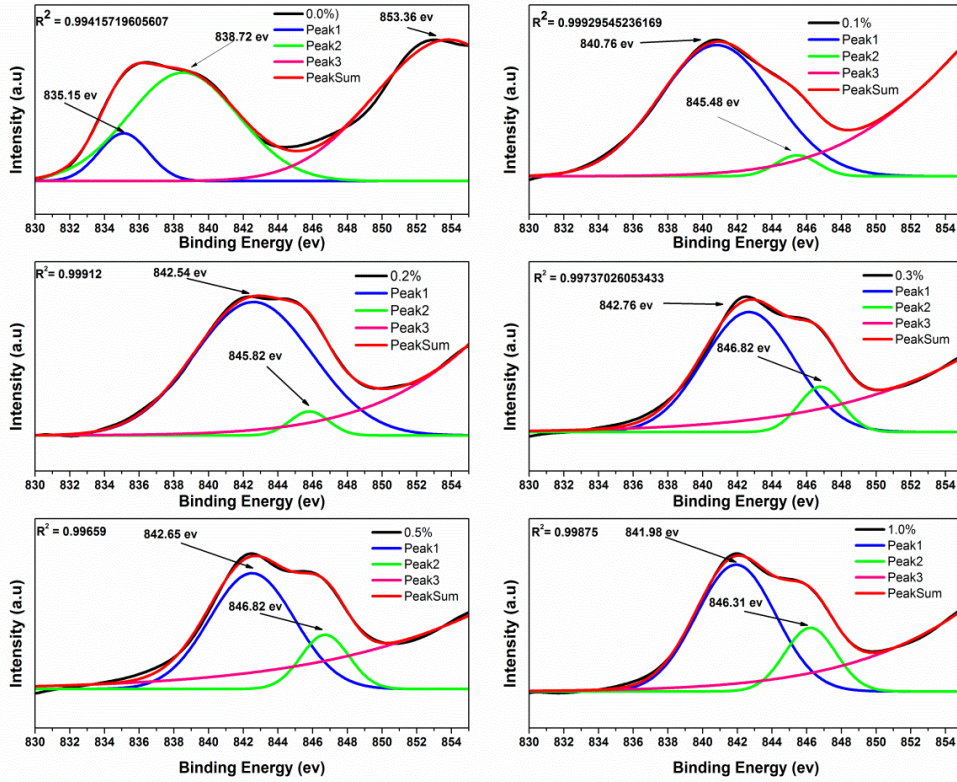

### Hf 4f (b)

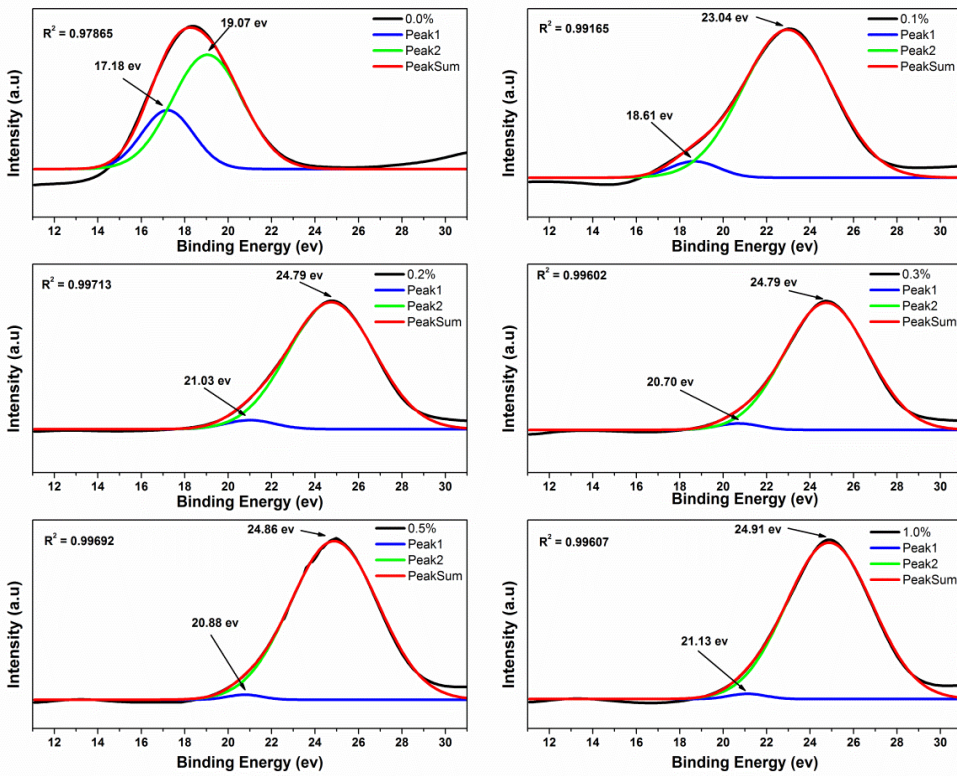

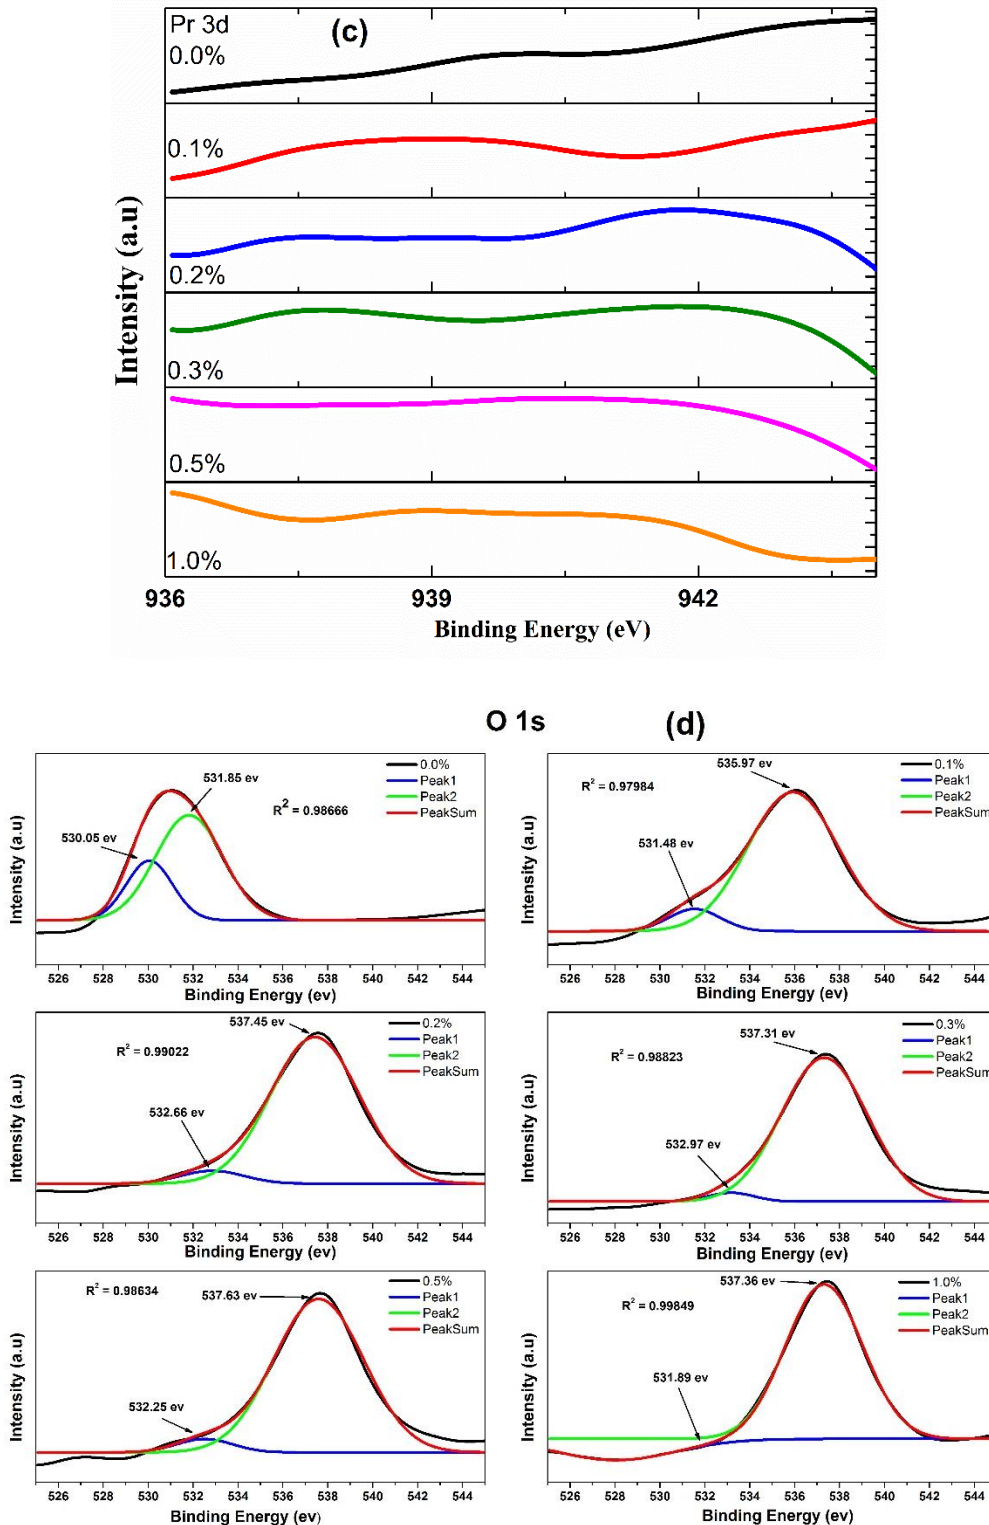

**Figure S2.** (a) XPS spectra for core electrons of (a) La 3d, (b) Hf 4f, (c) Pr 3d, and (d) O 1s of the  $\text{La}_2\text{Hf}_2\text{O}_7:x\%\text{Pr}^{3+}$  ( $x = 0, 0.1, 0.2, 0.3, 0.5, \text{ and } 1.0$ ) NPs.
